# Supplementary material
Source: Springer Nature journal article supplement (https://www.springermedizin.de/resource/supplementary/12885_2008_1092_MOESM1_ESM.pdf/9471100)
Supplement: MOESM1 [file 9471100]

**Additional file 1. Touchdown PCR for *ID4* mRNA expression analysis.**

| <b>Step</b>                                        | <b>Temperature</b> | <b>Time</b> | <b>Quantity</b> |
|----------------------------------------------------|--------------------|-------------|-----------------|
| Initial DNA Denaturation                           | 95°C               | 5 min.      | 1               |
| Denaturation                                       | 95°C               | 20 sec.     |                 |
| Primer Annealing                                   | 71°C               | 5 sec.      | 5               |
| Elongation (DNA-Synthesis)                         | 72°C               | 4 sec.      |                 |
| Touchdown to target temperature of 65°C (stepwise) | 1°C per Cycle      |             | 6               |
| Denaturation                                       | 95°C               | 20 sec.     |                 |
| Primer Annealing                                   | 65°C               | 5 sec.      | 28              |
| Elongation (DNA-Synthesis)                         | 72°C               | 4 sec.      |                 |
| Final Elongation (DNA-Synthesis)                   | 72°C               | 60 sec.     | 1               |
